## **Local Control of Intracellular Microtubule Dynamics by End Binding Protein 1 (EB1) Photo-Dissociation**

Jeffrey van Haren<sup>1</sup>, Andreas Ettinger<sup>1,2</sup>, Hui Wang<sup>3</sup>, Klaus M. Hahn<sup>3,4</sup>, Torsten Wittmann<sup>1,5</sup>

1 Department of Cell and Tissue Biology, University of California San Francisco, 513 Parnassus Avenue, San Francisco, CA 94143, U.S.A.

2 Current address: Institute of Epigenetics and Stem Cells, Helmholtz Center Munich, Marchioninistrasse 25, 81377 München, Germany

3 Department of Pharmacology, University of North Carolina Chapel Hill, Chapel Hill, NC, 27599, U.S.A.

4 Lineberger Cancer Center, University of North Carolina Chapel Hill, Chapel Hill, NC, 27599, U.S.A.

5 Corresponding author: [torsten.wittmann@ucsf.edu](mailto:torsten.wittmann@ucsf.edu)

1 **Dynamic remodelling of the microtubule cytoskeleton and local interactions with intracellular**  
2 **targets are central to many polarized cell biological processes, an idea first formalized as search-**  
3 **and-capture hypothesis three decades ago<sup>1</sup>. However, because of the rapid timescale of**  
4 **microtubule polymerization dynamics, it is difficult to directly ask how, when and where dynamic**  
5 **microtubules participate in specific biological processes. Here, we employ a blue light-sensitive**  
6 **interaction with the oat phototropin LOV2 domain<sup>2</sup> to generate a photo-inactivated variant of the**  
7 **microtubule end-binding protein EB1, a small adaptor that is central to the interaction of**  
8 **functionally and structurally diverse proteins with growing microtubule ends<sup>3,4</sup>, that can replace**  
9 **endogenous EB1 function. Acute and reversible blue light-mediated  $\pi$ -EB1 photo-dissociation**  
10 **allows spatially and temporally precise control of intracellular microtubule polymerization**  
11 **dynamics. In addition to demonstrating that neither the GTP cap nor the MT polymerase CKAP5 are**  
12 **sufficient to sustain persistent MT polymerization at physiological growth rates, our data illustrate**  
13 **accurate subcellular control of a freely diffusible, cytoplasmic protein at the second and**  
14 **micrometer scale. This novel design may serve as a template for precise control of many other**  
15 **intracellular protein activities.**

16  
17 Control of microtubule (MT) polymerization dynamics and interactions of growing MTs with other  
18 intracellular components are mediated by a heterogeneous class of proteins commonly referred to as  
19 +TIPs<sup>3,4</sup>. Most if not all +TIP interactions with growing MT ends require end-binding proteins (EBs).  
20 However, different +TIPs can have antagonistic activities. For example, interactions with EBs can  
21 recruit enzymes to growing MT ends promoting either MT polymerization<sup>5</sup> or depolymerization<sup>6</sup>, and  
22 it is not known how these opposing activities are spatially and temporally balanced in cells. It also  
23 remains unclear how MT dynamics and the +TIP network of proteins contribute to complex cell and  
24 tissue morphogenesis, which represents a significant gap in our understanding of physiological MT  
25 function<sup>7</sup>. Because genetic methods are orders of magnitude too slow to dissect highly dynamic +TIP  
26 functions in cells with sufficient spatial and temporal resolution, we targeted the +TIP adaptor activity  
27 of EB1 using a new 'opto-cell biology' approach.

28 EB1 is a small dimer that consists of two functional domains connected by an intrinsically disordered  
29 linker. The N-terminal CH domain recognizes the guanosine nucleotide state of growing MT ends<sup>8,9</sup>  
30 while the C-terminal EBH domain is required to recruit +TIPs to growing MT plus ends<sup>10</sup>. We predicted  
31 that controlling the connection of these two functional halves using a light-controlled protein

32 interaction pair would allow us to modulate +TIP functions in cells with high accuracy. While most  
33 light-sensitive protein interactions are induced by light<sup>11</sup>, the recently described Protein A Z-domain-  
34 derived affibody, Zdk1<sup>2</sup>, functions the opposite way and binds the oat phototropin LOV2 domain with  
35 high affinity in the dark, but dissociates from LOV2 in blue light (Fig. 1a). In addition, the LOV2/Zdk1  
36 pair is highly soluble, does not require exogenous co-factors in mammalian cells, and its molecular  
37 weight is less than that of GFP, and therefore should interfere minimally with protein function.

38 To develop a light-sensitive EB1 variant, we thus inserted the LOV2/Zdk1 module between the N-  
39 terminal and C-terminal halves of EB1 with the expectation that light-induced dissociation of these  
40 constructs would disrupt EB-mediated +TIP interactions with growing MT ends, without interfering  
41 with EBs ability to bind MTs. Because dimerization is required for efficient EB plus-end-tracking<sup>12,13</sup>,  
42 we further inserted a GCN4 leucine zipper (LZ) that is structurally similar to the EBH domain between  
43 the CH and LOV2 domains to retain dimerization and plus-end-tracking of the N-terminal half by  
44 itself. We refer to these photo-inactivated  $\pi$ -EB1 constructs as EB1N-LOV2 and Zdk1-EB1C (Fig. 1b).

45 Bacterially expressed GST-EB1N-LOV2 bound 6xHis-Zdk1-EB1C and precipitated both SxIP motif  
46 (CLASP2) and CAP-Gly motif (p150<sub>Glued</sub>) containing +TIPs from cell lysates indicating that the two  $\pi$ -  
47 EB1 halves interact and that Zdk1-EB1C is functional in binding known classes of +TIPs  
48 (Supplementary Fig. 1a). To directly visualize  $\pi$ -EB1 dynamics in live cells and because tagging EB1 at  
49 either the N- or C-termini interferes with EB1 function<sup>14</sup>, we inserted red or green FP tags N-terminal  
50 of the Zdk1 peptide. In these initial experiments to test the light response of the EB1N-LOV2 / Zdk1-  
51 EB1C interaction we photoactivated the LOV2 domain simply by turning on the 488 nm acquisition  
52 channel, which represents saturating blue light exposure. EGFP-Zdk1-EB1C was efficiently recruited to  
53 MT ends by non-tagged EB1N-LOV2, and dissociated from MT ends in response to blue light exposure  
54 with a half-life below 200 ms (Fig. 1d, e), which is close to the diffusion-limited turnover time of EB1  
55 molecules on MT ends<sup>15,16</sup>. Of note, Zdk1-EB1C remained enriched near the centrosomes that contain  
56 SxIP-motif +TIPs independent of growing MT ends<sup>17</sup>. Because the LOV2 C-terminus is required for  
57 Zdk1-binding, we further inserted a different FP tag between EB1N and LOV2 demonstrating that at  
58 short time scales plus-end-tracking of EB1N-LOV2 was not significantly reduced by  $\pi$ -EB1 photo-  
59 dissociation (Fig. 1f, g). These data demonstrate that both halves of  $\pi$ -EB1 are recruited to MT ends  
60 efficiently in the dark, and that blue light induces extraordinarily rapid  $\pi$ -EB1 photo-dissociation.

61 In order to test if  $\pi$ -EB1 was functional, we generated cell lines stably expressing  $\pi$ -EB1 constructs in  
62 which we subsequently depleted endogenous EB1 by lentivirus-mediated shRNA (Fig. 1c). We chose

63 H1299 non-small lung cancer cells because these cells express around twenty times more EB1 than  
64 EB3<sup>18</sup>. Consequently, unlike anti-EB1 antibodies, anti-EB3 antibodies only labelled MT ends in cells  
65 also expressing EB3-mCherry (Supplementary Fig 1c). EB3-mCherry also partially dissociated from MT  
66 ends upon  $\pi$ -EB1 photo-dissociation, likely reflecting some degree of heterodimerization with  $\pi$ -EB1  
67 and supporting a dominant effect of  $\pi$ -EB1 inactivation even in the presence of small amounts of  
68 endogenous EBs (Supplementary Fig. 2a)<sup>13,19</sup>. Although the  $\pi$ -EB1 H1299 cell lines expressed the  
69 EB1N-LOV2 and Zdk1-EB1C constructs at a slightly lower level compared with endogenous EB1 in  
70 control cells (Fig. 1c), these cells that are used in subsequent functional experiments were viable with  
71 no obvious phenotype, indicating that  $\pi$ -EB1 can replace endogenous EB1 function.

72 In addition, all EB-dependent +TIPs tested tracked MT plus ends in non-illuminated cells, but  
73 disappeared from MT ends with similarly fast kinetics as Zdk1-EB1C during blue light exposure (Figs.  
74 2a and 1e) confirming that MT end association of MCAK, CLASP2, and SLAIN2 critically depends on  
75 interactions with the C-terminal domain of EB1. +TIP dissociation was further reversible over multiple  
76 cycles of light exposure (Fig. 2b; Supplementary Video 1) indicating that  $\pi$ -EB1 photo-dissociation  
77 rapidly and reversibly disrupts the MT plus end +TIP complex. +TIPs only dissociated from growing MT  
78 ends and not from other binding sites; e.g. CLASP2 remained at the Golgi apparatus<sup>20</sup> (Supplementary  
79 Fig. 2b), demonstrating that +TIP dissociation from MT plus ends is specific to the light-sensitive  
80 dissociation of the two  $\pi$ -EB1 halves.

81 Because  $\pi$ -EB1 likely diffuses freely through the cytoplasm<sup>16</sup>, spatial control inside cells requires rapid  
82 return of photoactivated  $\pi$ -EB1 molecules to the dark state to prevent diffusion of activated  
83 molecules throughout the cell. Compared with wild-type LOV2, re-association of  $\pi$ -EB1 containing the  
84 previously described I427V LOV2 variant<sup>2,21</sup> occurred approximately twice as fast with a half-life of  
85 less than 5 s at saturating blue light levels (Fig. 2c, d). To minimize blue light-induced phototoxicity  
86 through potential FMN decomposition and singlet oxygen generation<sup>22</sup>, we next determined the  
87 minimum blue light dosage required for sustained  $\pi$ -EB1 photo-dissociation. Because most light  
88 sources cannot be reliably modulated over a sufficiently wide range of intensities, we instead used  
89 pulse width modulation to achieve specific radiant exposures by briefly flashing a 470 nm LED at a  
90 given irradiance level ( $\sim 18 \text{ mW mm}^{-2}$ ) at a frequency of 1 Hz between camera exposures (Fig. 2e).  
91 Compared with wild-type LOV2, an approximately three times increased blue light exposure was  
92 needed to reach steady state at which half of  $\pi$ -EB1 with the faster LOV2 domain variant dissociated  
93 from MT ends, indicating that faster LOV2 dark recovery comes at a cost of increased blue light

94 exposure needed for photoactivation. Importantly, however, for both LOV2 variants the required  
95 radiant exposure to achieve complete  $\pi$ -EB1 photo-dissociation is several orders of magnitude below  
96 light doses encountered in fluorescence microscopy, which can easily exceed  $100 \text{ mJ mm}^{-2}$  per  
97 exposure at typical irradiance levels<sup>23</sup>, suggesting that the photodamage associated with  $\pi$ -EB1  
98 photoactivation should be negligible.

99 Next, we used a mask generated with a digital micromirror device (DMD) to test if LOV2  
100 photodynamics are sufficient to achieve local  $\pi$ -EB1 inactivation at optimized exposure levels. Using  
101 the faster LOV2 variant, 20 ms 470 nm light pulses of  $\sim 1 \text{ mJ mm}^{-2}$  every second (i.e. a 2% duty cycle)  
102 were sufficient to achieve intracellular gradients with 95% difference in  $\pi$ -EB1 photo-dissociation  
103 over a width of  $\sim 20 \mu\text{m}$  (Fig. 2f, g), and to reversibly switch  $\pi$ -EB1 photo-dissociation between  
104 different intracellular regions (Fig. 2h; Supplementary Video 2). To our surprise, wild-type LOV2  
105 achieved a boundary that was almost as steep at a lower blue light exposure (10 ms, 1% duty cycle).  
106 In both cases, the boundary steepness was similar to the edge steepness of the illumination pattern  
107 (Fig. 2g), which we found to be significantly shallower than what could be theoretically expected from  
108 the optical resolution limit. This indicates that in our system boundary steepness is mostly  
109 determined by focus and scattering of the illumination pattern edge, which is a current technical  
110 limit, and less by biophysical properties such as diffusion of photo-dissociated  $\pi$ -EB1 molecules out of  
111 the blue light-exposed region. Because of the lower light dose required to activate wild-type LOV2,  
112 we therefore continued to use the wild-type LOV2  $\pi$ -EB1 for subsequent experiments.

113 Many +TIPs that are recruited to MT ends through interactions with EB1 directly or indirectly  
114 influence MT polymerization dynamics, but it is not understood how potentially antagonistic +TIP  
115 activities are integrated in cells and spatially controlled in real time<sup>3</sup>. Although previous siRNA  
116 depletion of EB proteins demonstrated defects in MT polymerization dynamics<sup>13,24</sup>, such experiments  
117 are confounded by indirect and adaptive mechanisms in genetically depleted cells and cannot directly  
118 address specific protein actions in real time. We therefore tested how  $\pi$ -EB1 photo-dissociation  
119 acutely altered MT dynamics and organization. Computational tracking of EB1N-mCherry-LOV2 that  
120 remains on growing MT ends upon  $\pi$ -EB1 photo-dissociation revealed an overall attenuation of MT  
121 growth and a reduction in the number of growing MT ends within 30 s of blue light exposure (Fig. 3a,  
122 b; Supplementary Video 3). Further analysis of growth rate distributions indicated that  $\pi$ -EB1 photo-  
123 dissociation specifically reduced the growth rate of a fast growing MT population (Fig. 3c) that likely  
124 represent persistently growing MTs in the cell interior<sup>25</sup>. Importantly, these changes were reversible,

125 and MT dynamics nearly completely recovered within minutes of terminating blue light exposure (Fig.  
126 3b). Moreover, the fast photodynamics of  $\pi$ -EB1 allowed for locally restricted control of MT growth  
127 dynamics (Fig. 3d; Supplementary Video 4). Analysis at higher temporal resolution further showed  
128 that individual MTs can continue fast growth for a short period of time before slowing down,  
129 becoming more dynamic and transitioning to depolymerisation (Fig. 3e) and that the growth rate of  
130 the MT population decayed with a half-life of  $\sim 5$  seconds following blue light exposure (Fig. 3f).  
131 Because this is an order of magnitude slower than  $\pi$ -EB1 photo-dissociation (Fig. 1e), it must reflect  
132 an intrinsic MT property and is in good agreement with the average life-time of the cap of high  
133 affinity EB1 binding sites determined *in vitro*<sup>26</sup>. This suggests that the GTP-like MT end cap can  
134 temporarily maintain a MT end structure permissive of fast MT growth. However, in contrast to *in*  
135 *vitro* where the MT end cap is thought to sufficiently protect slow polymerizing MTs<sup>27</sup>, our data show  
136 that in cells it cannot maintain continued persistent MT growth, which is  $\sim 10$  faster and occurs at  
137 limiting free tubulin concentrations. Similarly, the N-terminal MT-binding part of  $\pi$ -EB1 by itself, and  
138 thus structural changes induced by EB1 binding<sup>9</sup>, are insufficient to maintain persistent MT growth.  
139 Instead, direct EB1 effects on MT dynamics in cells are outweighed by the activities of the EB1-  
140 recruited +TIP complex.

141 These data also demonstrate that EB1-mediated recruitment of MT-polymerizing activities is  
142 dominant in interphase cells. Because SLAIN2, a +TIP that directly binds to and has been proposed to  
143 recruit the MT polymerase CKAP5<sup>5</sup>, was rapidly lost from MT ends following  $\pi$ -EB1 photo-dissociation  
144 (Fig. 1e; Fig. 2a, b) we next analysed the dynamics of CKAP5 in response to  $\pi$ -EB1 photo-dissociation.  
145 Although CKAP5-mKate2 dots were only visible by TIRF microscopy<sup>28</sup> and difficult to follow over  
146 longer time periods, dynamic CKAP5 dots remained at MT ends after  $\pi$ -EB1 photo-dissociation at time  
147 points at which persistent MT growth has completely ceased (Fig. 4; Supplementary Video 5). Thus,  
148 EB1-mediated +TIP complexes including endogenous amounts of SLAIN2 do not recruit CKAP5 to MT  
149 ends, which might be expected from their distinct non-overlapping binding domains along MT ends<sup>28</sup>.  
150 Importantly, however, in cells CKAP5 localization to MT ends by itself is also not sufficient to promote  
151 fast, persistent MT growth, but requires an EB1-dependent +TIP activity, which is distinct from the  
152 synergistic MT growth acceleration by CKAP5 and EB1 observed *in vitro*<sup>29</sup>.

153 Lastly, we tested if and how acute photo-dissociation of the MT +TIP complex altered intracellular MT  
154 organization in tubulin-mCherry expressing  $\pi$ -EB1 cells. Although difficult to quantify precisely, the  
155 density of the peripheral MT network dropped rapidly during, and recovered within minutes after

156 terminating blue light exposure (Fig. 5a). An overall decrease of polymerized MTs was further  
157 supported by a robust increase in cytoplasmic tubulin-mCherry fluorescence, which reached a new  
158 steady state in less than a minute ( $t_{1/2} = \sim 13$  s; Fig. 5b) as individual MTs depolymerized in response to  
159  $\pi$ -EB1 photo-dissociation (Fig. 5c; Supplementary Video 6). Interestingly, two distinct MT populations  
160 appeared to respond differently. Many radial MTs underwent catastrophes and rapid shortening  
161 events within 5-10 s of  $\pi$ -EB1 photo-dissociation (Fig. 5d) consistent with the observed delay in  
162 growth rate attenuation (Fig. 3f). In contrast, an underlying population of more curvy MTs was  
163 qualitatively more resistant to  $\pi$ -EB1 dissociation indicating that these MTs are stabilized by  
164 mechanisms that no longer require a growth-promoting +TIP complex. In migrating cells, the MT  
165 cytoskeleton is polarized forward<sup>30</sup>. Because H1299 cells did not directionally migrate as single cells,  
166 to test how EB1-recruited +TIP complexes contribute to MT cytoskeleton polarity, we instead  
167 expressed constitutively active Rac1(Q61L) in  $\pi$ -EB1 cells, which induces isotropic leading edge  
168 protrusion, and exposes fast MT growth toward the cell edge that counter-balances retrograde F-  
169 actin flow<sup>31</sup>. Local  $\pi$ -EB1 photo-dissociation resulted in a dramatic retraction of these MTs from  
170 Rac1(Q61L)-induced lamellipodia (Fig. 5e; Supplementary Video 7), indicating that EB1-recruited +TIP  
171 complexes are specifically required to maintain fast growth of this MT population, in addition to  
172 Rac1-mediated inactivation of MT destabilizing activities<sup>32,33</sup>. Importantly, by using patterned blue  
173 light exposure intracellular asymmetry of MT network organization could be generated rapidly and  
174 maintained for extended periods of time.

175 In summary, we demonstrate acute and local control of EB1 function in cells by replacing the  
176 endogenous protein with a light-sensitive variant. Acute perturbation of the +TIP complex resulted in  
177 a new equilibrium of MT polymerization dynamics in less than a minute demonstrating the rapid  
178 response time by which cells can reshape their MT network. We find that EB1-mediated +TIP  
179 complexes predominantly promote MT polymerization and dominate potential destabilizing effects of  
180 direct EB1-binding to MTs, and that unlike *in vitro*, the intrinsic GTP-MT cap is not sufficient to  
181 maintain persistent and fast MT polymerization in cells without EB1-recruited +TIP activities.  
182 Intriguingly, this +TIP activity does not simply recruit the major MT polymerase CKAP5 to MT ends,  
183 but may activate it by other mechanisms that are currently not understood. As a consequence light-  
184 sensitive  $\pi$ -EB1 functions as a novel reagent to attenuate MT polymerization and control intracellular  
185 MT organization with high spatial and temporal precision, which will be essential to dissect dynamic  
186 MT functions in complex cell and tissue morphogenetic processes. Of broader impact, we believe that

187 our approach to insert a light-sensitive protein-protein interaction module between functional  
188 domains is a powerful new strategy applicable to a large fraction of the proteome enabling new  
189 spatially and temporally resolved experimental questions that cannot be addressed by genetic means  
190 alone.  
191



192 **Methods**

193 **DNA constructs and molecular cloning.** mCherry-EB3 was from the Michael Davidson plasmid  
194 collection (Addgene plasmid #55037). mCherry-CLASP2 $\gamma$  was cloned by replacing the AgeI/KpnI  
195 restriction fragment of pEGFP-CLASP2 $\gamma$ <sup>34</sup> with the corresponding fragment of pmCherry-C1. Similarly,  
196 mCherry-MCAK was cloned by replacing the AgeI/BsrGI fragment of mEmerald-MCAK (Addgene  
197 plasmid #54161, from Michael Davidson) with the corresponding fragment of pmCherry-C1. mCherry-  
198  $\alpha$ -tubulin was obtained from Roger Tsien (Addgene plasmid #49149). PCR-based cloning strategies for  
199 other constructs are summarized below, and all primers used are listed in supplementary Table 1:

- 200 1. EB1N-LZ-LOV2 was constructed as follows: The coding regions corresponding to amino acids 1-  
201 185 of an EB1 shRNA-resistant variant<sup>24</sup> and a GCN4 leucine zipper (generated by oligonucleotide  
202 assembly PCR) were first amplified, and then connected by overlap extension PCR, and the  
203 resulting product ligated into the NheI/XhoI digested backbone of pEGFP-C1. The LOV2 coding  
204 sequence originated from PA-Rac1 (Addgene plasmid #22027)<sup>35</sup>, and L406/407A mutations that  
205 were reported to stabilize docking of the  $\alpha$ -helix<sup>36</sup> as well as a GSGSG linker sequence were  
206 introduced by PCR. This modified LOV2 domain including the linker was amplified and inserted  
207 into the SacII/BamHI sites of the EB1N-LZ plasmid.
- 208 2. EB1N-LZ-EGFP-LOV2 and EB1N-LZ-mCherry-LOV2 were cloned by inserting PCR amplified  
209 EGFP/mCherry coding sequences into XhoI/SacII sites of EB1N-LZ-LOV2.
- 210 3. EB1N-EGFP-LZ-LOV2 was cloned by inserting the coding sequence for the PCR-amplified GCN4  
211 leucine zipper into the SacII site of EB1N-GFP-LOV2 by Gibson assembly.
- 212 4. mCherry-Zdk1-EB1C was cloned in the following way: PCR-amplified mCherry-Zdk1-linker (from  
213 pTriEx-mCherry-Zdk1, Addgene plasmid #81057) and the EB1 C-terminal fragment corresponding  
214 to amino acids 186-268 were connected by overlap extension PCR. The resulting PCR product was  
215 inserted into the NheI/XhoI sites of pEGFP-C1. EGFP-Zdk1-EB1C was generated by excising EGFP  
216 from pEGFP-C1 by restriction digestion with NheI/BsrGI and ligation into NheI/BsrGI digested  
217 mCherry-ZDK1-EB1C, thereby replacing mCherry with EGFP. Untagged ZDK1-EB1 was made by  
218 removing mCherry from mCherry-ZDK1-EB1 by restriction digestion with NheI/BsrGI, and removal  
219 of overhangs by T4 polymerase, followed by ligation.
- 220 5. GST-EB1N-LZ-LOV2 was cloned by inserting PCR amplified EB1N-LZ-LOV2 into the BamHI/XmaI  
221 sites of pGEX-4T-2 (GE Life Sciences).

- 222 6. 6xHis-Zdk1-EB1C was cloned by inserting PCR-amplified ZDK1-EB1C into NheI/XhoI sites of  
223 pET28a.
- 224 7. GST-LOV2 was cloned by inserting the PCR-amplified LOV2 coding sequence including a GSGSG  
225 linker into BamHI/XhoI sites of pGEX-4T-2.
- 226 8. mCherry-Slain2 was cloned by inserting the PCR amplified SLAIN2 coding sequence into the  
227 XhoI/EcoRI sites of pBio-mCherry-C1.
- 228 9. CKAP5-mKate2 was cloned by inserting the PCR amplified mKate2 coding sequence into the  
229 BamHI/NotI sites of chTOG-GFP (Addgene #29480, from Linda Wordeman)

230 **Cell culture and generation of the  $\pi$ -EB1 cell line.** NCI-H1299 human non-small cell lung cancer cells  
231 were cultured in RPMI1640 supplemented with 10%FBS, penicillin/streptomycin and non-essential  
232 amino acids at 37°C, 5% CO<sub>2</sub> in a humidified tissue culture incubator. According to NIH guidelines, the  
233 identity of NCI-H1299 cells was confirmed by short tandem repeat profiling (IDEXX BioResearch) using  
234 a standard 9-marker panel: AMEL(X); CSF1PO(12); D13S317(12); D16S539(12,13); D5S818(11);  
235 D7S820(10); THO1(6,9.3); TPOX(8); vWA(16,17,18). The profile obtained was identical to the one  
236 reported by the ATCC.

237 To replace endogenous EB1 with  $\pi$ -EB1 and prevent cells from adapting to EB1 depletion, we first  
238 generated stable cell lines expressing both halves of an shRNA resistant variant of  $\pi$ -EB1. H1299 cells  
239 were transfected with both untagged EB1N-LOV2 and EGFP-Zdk1-EB1C plasmids and selected with  
240 500  $\mu$ g/ml G418. Clones expressing both halves at comparable expression levels were identified by  
241 microscopy and colonies selected in which EGFP-Zdk1-EB1C was clearly localized to growing MT ends,  
242 which requires presence of the unlabelled N-terminal part. Colonies with low MT plus-end to  
243 cytoplasm ratio or displaying strong MT lattice labelling were discarded because expression of both  
244 halves was expected to be unequal. Expression of both  $\pi$ -EB1 halves was verified by immunoblot  
245 using antibodies that specifically recognize either the EB1 N- (Thermo Fisher Scientific Clone 1A11/4)  
246 or C-terminal half (BD Biosciences Clone 5/EB1). Next we knocked down endogenous EB1 in these  
247 clones by pLKO.1 lentivirus-mediated shRNA. The EB1 shRNA lentivirus and shRNA resistant variants  
248 were as described<sup>24</sup>. Selected colonies were sorted at the UCSF Parnassus Flow Cytometry Core to  
249 obtain a homogenous population of cells.  $\pi$ -EB1 cells were then transfected with mCherry-tagged  
250 constructs for functional experiments either using Fugene6 (Roche) or Lipofectamine 2000 (Life  
251 Technologies) according to manufacturer's instructions.

252 **EB1/3 immunofluorescence.** Cells grown on clean #1.5 glass coverslips (64-0713, Warner  
253 Instruments) were fixed in -20°C methanol for 10 min, washed with PBS and blocked with blocking  
254 buffer (PBS, 2% BSA, 0.05% Tween 20) for 30 min. Mouse anti-EB1 (BD Biosciences Clone 5/EB1) and  
255 rat anti-EB3 (KT36, Absea) antibodies were diluted in blocking buffer (1:150) and 50  $\mu$ l drops were  
256 spotted on a sheet of parafilm in a humidified chamber. Coverslips were placed on top of these  
257 droplets (cells facing down), and incubated for one hour at room temperature, after which the  
258 coverslips were washed 3 times in PBS, 0.05% Tween 20. Fluorescent secondary antibodies (Alexa488  
259 or Alexa568 conjugated goat anti-mouse or rat antibodies, Invitrogen) were diluted in blocking  
260 solution (1:400), and coverslips incubated and washed as above. Coverslips were dehydrated by brief  
261 immersion in 70% ethanol followed by 100% ethanol, air dried and mounted in Mowiol mounting  
262 medium (0.1 M Tris-HCl pH8.5, 25% glycerol, 10% Mowiol 4-88).

263 **In vitro binding assays and native PAGE.** GST- and 6xHis-tagged proteins were produced in *E.coli*  
264 BL21 using standard protocols. Briefly, bacteria were lysed by three freeze thaw cycles in dry-ice in  
265 lysis buffer (TBS, 0.5% TX-100, 1mM PMSF, 0.5mg/ml lysozyme) followed by DNase treatment  
266 (1 $\mu$ g/ml). Lysates were cleared by centrifugation at 16000g for 10 min at 4°C, and incubated with  
267 glutathione sepharose (GE Healthcare), or Talon resin (Clontech). Affinity resins were washed twice  
268 with low salt buffer (TBS, 0.1% TX-100, 5mM 2-mercaptoethanol), three times with high salt buffer  
269 (TBS, 650mM NaCl, 0.1% TX-100, 5mM 2-mercaptoethanol). For purification of LOV2-containing  
270 constructs, an additional incubation step with low salt buffer containing 5 mg/ml riboflavin 5'-  
271 phosphate (FMN) to ensure stoichiometric loading of the LOV2 domain with the FMN co-factor.  
272 Proteins were eluted in low salt buffer containing either 25 mM reduced glutathione (pH 8.5), or  
273 150mM imidazole, dialyzed and concentrated (Amicon Ultra-15 centrifugal filters, 3000MWCO), and  
274 aliquots snap-frozen in liquid nitrogen.

275 Interaction between LOV2 and Zdk1 was monitored by discontinuous native PAGE. Purified LOV2 and  
276 Zdk1 fusion proteins were mixed and incubated for 30 min at 4°C, and LOV2/Zdk1 complexes run on  
277 6% native PAGE gels in Tris-Glycine buffer pH 8.3 at 75 V for 2 hours. A custom made 470 nm LED  
278 array was placed in front of the electrophoresis tank to photoactivate LOV2 as the proteins migrated  
279 through the gel.

280 To test  $\pi$ -EB1 +TIP-binding *in vitro*, H1299 cells were lysed in ice cold 50 mM Tris-HCl, 150 mM NaCl,  
281 0.1% Triton X-100, containing protease inhibitors (cOmplete Protease Inhibitor Cocktail, Sigma) for 30  
282 min. Lysates were cleared by centrifugation at 13000 rpm in an Eppendorf microcentrifuge, and

283 added to glutathione sepharose beads loaded with GST-EB1N-LZ-LOV2 and 6xHis-Zdk1-EB1C,  
284 incubated on ice for 30 min, and washed extensively. Bound proteins were analyzed by SDS-PAGE,  
285 wet transfer to nitrocellulose (GVS, 1212590) for 1 h at 60V (Bio-Rad Mini Trans-Blot), and  
286 chemiluminescent detection with horseradish peroxidase-conjugated secondary antibodies using a  
287 Fluorchem Q gel documentation system (92-14116-00, Alpha Innotech) using standard protocols.  
288 Primary antibodies: Mouse anti-p150<sup>Glued</sup> (BD Transduction Laboratories); rat anti CLASP2 (KT68,  
289 Absea).

290 **Microscopy, photoactivation and image analysis.** Fluorescent protein dynamics were imaged by  
291 spinning disk or TIRF microscopy on a customized microscope setup essentially as described<sup>23,37,38</sup>,  
292 except that the system was upgraded with a next generation scientific CCD camera (cMyo,  
293 Photometrics) with 4.5  $\mu\text{m}$  pixels allowing optimal spatial sampling using a 60x NA 1.49 objective (CFI  
294 APO TIRF; Nikon). Global  $\pi$ -EB1 photo-dissociation was achieved by turning on the 488 nm excitation  
295 channel. An irradiance of  $\sim 250 \text{ mW/cm}^2$  was sufficient to photoactivate the LOV2 domain although  
296 simultaneous imaging of EGFP-tagged proteins required higher light intensity. Irradiance at the  
297 specimen plane was measured using a X-Cite XR2100 light power meter (EXFO Photonic Solutions).

298 To achieve subcellular  $\pi$ -EB1 photo-dissociation, a digital micromirror device (Polygon 400, Mightex)  
299 equipped with a 470 nm LED was mounted on a Nikon TI auxiliary camera port equipped with a  
300 beamsplitter such that 20% of the light path was diverted for photoactivation and 80% was used for  
301 spinning disk confocal microscopy. This allowed for direct imaging of the reflected illumination  
302 pattern to accurately focus the Polygon 400 as well as simultaneous imaging and  $\pi$ -EB1 photo-  
303 dissociation. To eliminate scattered photoactivation light in the imaging channel, the Polygon 400  
304 was operated such that short 10-20 ms blue light pulses were triggered to occur between image  
305 acquisitions. For fast time-lapse experiments (at or above 1 frame per second), the Polygon 400 was  
306 directly triggered by the camera using a short delay of a few hundred ms after camera exposure. For  
307 slower time-lapse experiments, the camera trigger was used to start a pre-programmed pulse  
308 sequence between exposures using an ASI MS2000 Sequencer module.

309 Image analysis was performed in NIS Elements 4.3 or Fiji<sup>39</sup>. Fluorescence intensities were measured in  
310 small regions of 3-5 pixel diameter on MT ends that were moved in time with MT growth, and nearby  
311 cytoplasm as local background. MT end / cytoplasm ratios were calculated as previously described<sup>40</sup>.  
312 A ratio of one indicates no measurable difference between MT end and local cytoplasm. MT plus end  
313 tracking of mCherry-EB1N was done using u-track 2.1.3 (available from Gaudenz Danuser at

314 <http://www.utsouthwestern.edu/labs/danuser/software/>)<sup>41,42</sup>. ‘Comet Detection’ parameters were  
315 adapted to decrease the number of false positive detections as follows: ‘High-pass Gaussian standard  
316 deviation’: 6; Watershed segmentation ‘Minimum threshold’: between 6 and 8; other parameters  
317 remained at default settings. Similarly, in the ‘Tracking’ step, the ‘Minimum Length of Track  
318 Segments’ was set to 4. In order to not bias average MT growth rates toward shorter tracks, frame-  
319 to-frame MT growth rates were extracted from the ‘tracksFinal’ structure using a custom MatLab  
320 script, and frame-to-frame displacements of less than 0.5 pixels were excluded. Tubulin-mCherry  
321 labelled MTs ends were tracked using the Fiji MtrackJ plugin<sup>43</sup>.  
322 Statistical analysis was done with the Analyse-It plugin for Microsoft Excel. Statistical significance of  
323 multiple comparisons was calculated using the Tukey-Kramer HSD test after confirming normal  
324 distribution of the data by Shapiro Wilk testing. Least square curve fitting was performed using the  
325 Solver plugin in Microsoft Excel<sup>44</sup>. Figures were assembled in Adobe Illustrator CS5, and videos using  
326 QuickTime Pro.

327

328

#### 329 **Author Contributions:**

330 J.v.H. and T.W. designed experiments, analysed data and wrote the manuscript. J.v.H. performed  
331 most experiments. A.E. performed experiments and generated reagents. H.W. and K.H. contributed  
332 unpublished reagents.

333

#### 334 **Acknowledgements**

335 This work was supported by National Institutes of Health grants R01 GM079139, R01 GM094819, and  
336 S10 RR26758 to T.W. We thank all members of the CTB community for discussions and comments on  
337 the manuscript.

338

#### 339 **Competing financial interests**

340 The authors declare no competing financial interests.

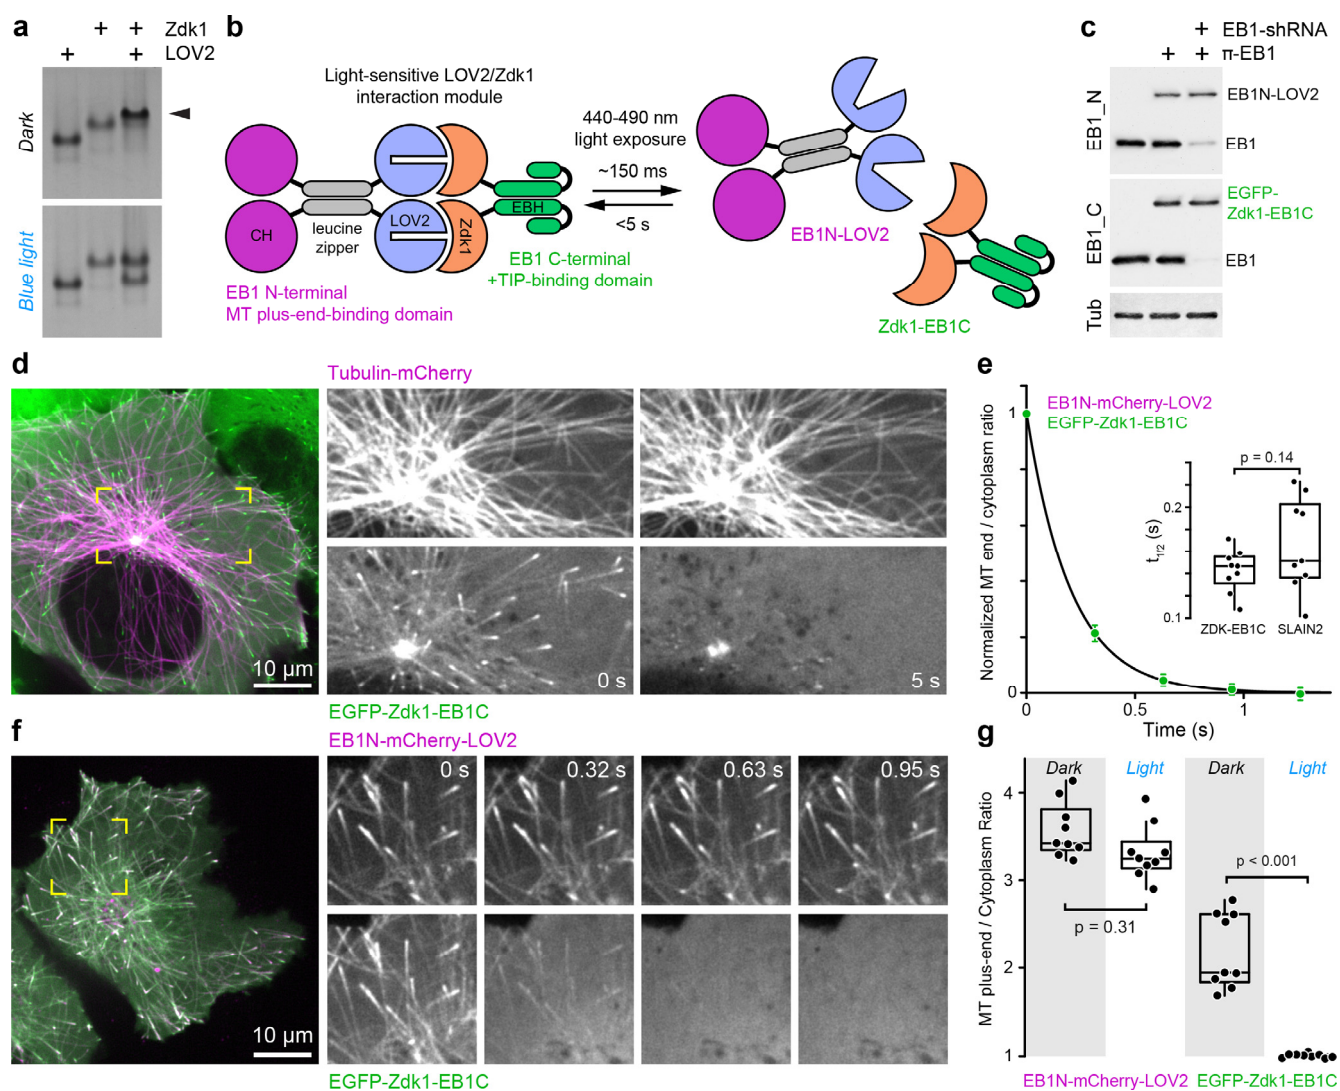

**Figure 1. A light-sensitive EB1 variant can replace endogenous EB1 function.**

**(a)** Interaction of purified LOV2 domain and Zdk1 peptide analysed by native PAGE. Blue light results in dissociation of the LOV2/Zdk1 complex (arrow) that is upshifted compared to LOV2 or Zdk1. **(b)** Schematic of the photo-inactivated  $\pi$ -EB1 design resulting in reversible dissociation of the N-terminal MT-binding and the C-terminal +TIP adapter domains upon blue light exposure. **(c)** Analysis of EB1 and  $\pi$ -EB1 expression levels in H1299 cell lines in which  $\pi$ -EB1 constructs were stably expressed and endogenous EB1 depleted by shRNA. Immunoblots were probed with antibodies specific to either the C- or N-terminus of EB1. **(d)** Cell expressing Tubulin-mCherry and EGFP-tagged Zdk1-EB1C before and after 5 s of exposure to 488 nm blue light resulting in dissociation of Zdk1-EB1C from growing MT plus ends. **(e)** Analysis of the blue light-induced EGFP-Zdk1-EB1C dissociation rate from MT ends.  $n = 9$  cells. Error bars are 95% confidence intervals. Solid line is a fit with an exponential decay. Inset shows

the comparison of dissociation half-lives of Zdk1-EB1C and SLAIN2, a +TIP that depends on EB1 for MT end association. **(f)** Cell expressing both halves of  $\pi$ -EB1 fluorescently tagged showing that EB1N-LOV2 remains on growing MT ends after blue light exposure. Time stamps indicate duration of blue light exposure. Dual-wavelength images were acquired simultaneously using an emission image splitter. **(g)** Analysis of the amount of the two  $\pi$ -EB1 halves bound to MT ends before and during 1 s of blue light exposure. In **e** and **g**, each symbol represents the average of 6-8 measurements from one cell. p-values were determined by Tukey-Kramer HSD test.

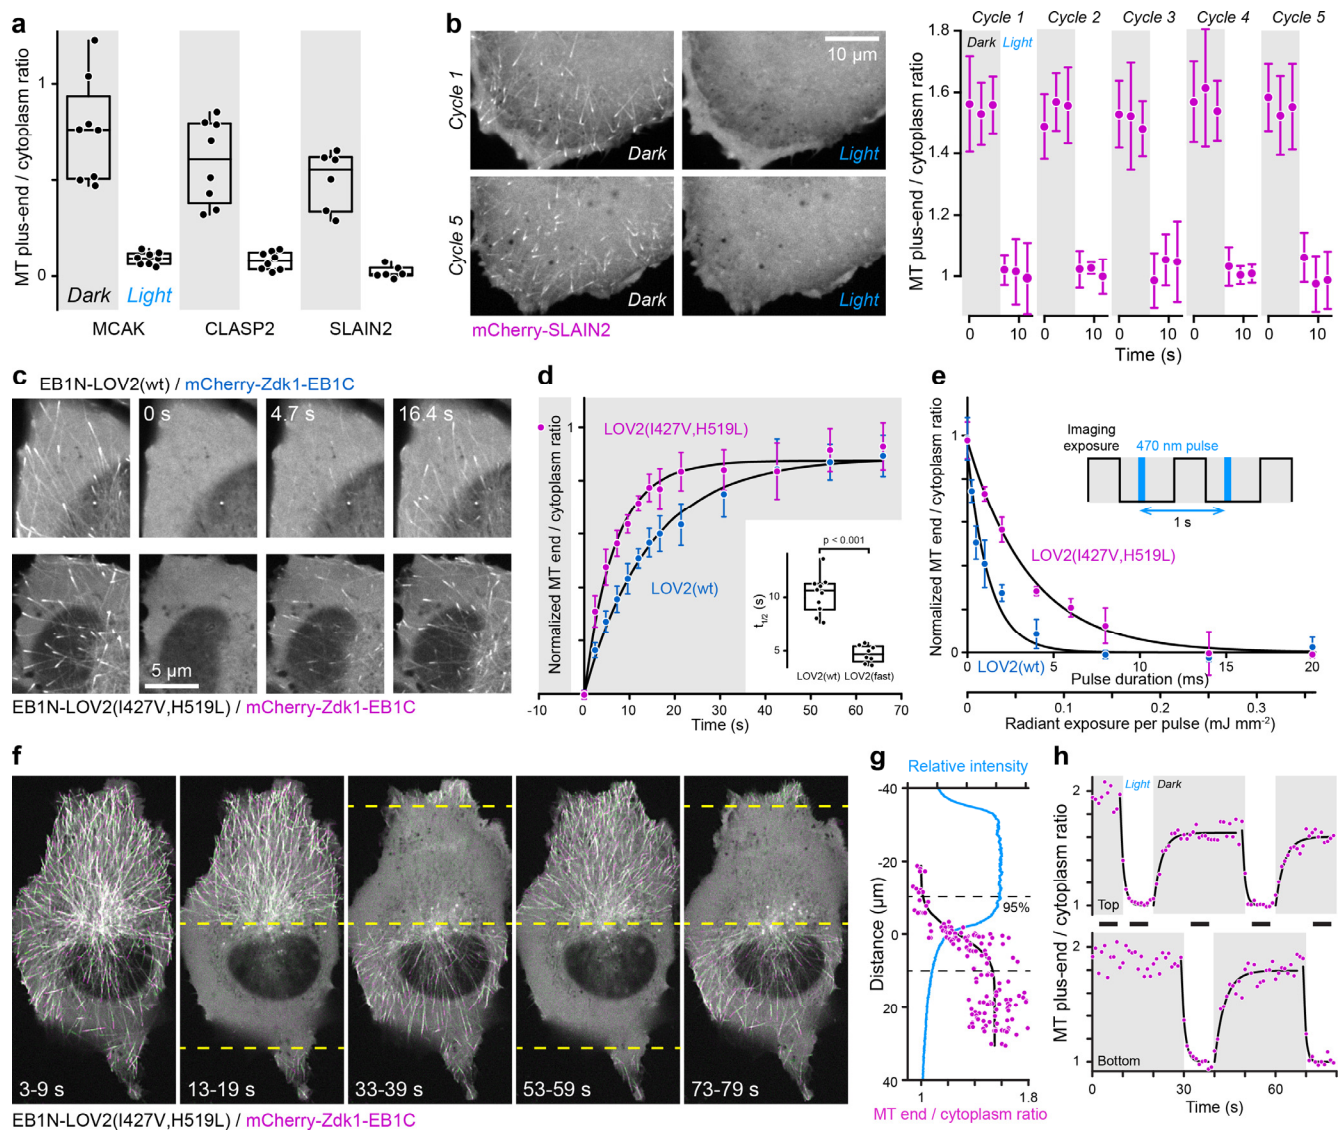

**Figure 2. Spatially and temporally reversible photo-dissociation of +TIP complexes.**

**(a)** Analysis of the amount of the indicated EB1-dependent +TIPs bound to MT ends before and during 1 s of blue light exposure in  $\pi$ -EB1 / EB1 shRNA cells. Each symbol represents the average of 10 measurements per cell. **(b)** Reversible blue light-induced disruption of mCherry-SLAIN2 binding to MT ends in  $\pi$ -EB1 / EB1 shRNA cells. Graph shows mCherry-SLAIN2 MT end association over multiple cycles of blue light exposure.  $n = 6$  MT ends. Error bars show standard deviation. **(c)** Comparison of Zdk1-EB1C recovery on MT plus ends in cells expressing  $\pi$ -EB1 containing either wild-type LOV2 or the LOV2(I427V,H519L) variant. Time stamps indicate time elapsed after blue light exposure was terminated. **(d)** Analysis of recovery rates of  $\pi$ -EB1 containing the indicated LOV2 variants.  $n = 8-10$  cells. Error bars are 95% confidence intervals. Solid lines are exponential curve fits. Inset shows the



comparison of recovery half-lives. **(e)** Analysis of Zdk1-EB1C MT plus end association in  $\pi$ -EB1 constructs with the indicated LOV2 variants as a function of blue light radiant exposure. Total blue light dose was varied by pulse width modulation as illustrated in the inset. Measurements were taken at steady state after 40 s of pulsed blue light exposure showing tuning of  $\pi$ -EB1 photo-dissociation at intermediate exposure levels.  $n = 3-4$  cells per pulse length. Error bars are 95% confidence intervals. Solid lines are exponential curve fits. **(f)** Patterned blue light exposure within the regions indicated by dashed lines shows high spatial and temporal accuracy of  $\pi$ -EB1 photo-dissociation. In this example, the blue light pattern is switched every 10 s. Images are projections of the indicated time periods showing sequential time points in alternating green and purple. These time periods are also indicated as black bars in **h**. **(g)** Analysis of Zdk1-EB1C MT plus end association at the boundary of the blue light pattern corresponding to the 33-39 s period showing the best achievable spatial control. Solid line is a fit with a cumulative normal distribution. Dashed lines demarcate the 95% switch (i.e.  $\pm 2 \sigma$ ) in MT end association calculated from the fit. **(h)** Analysis of Zdk1-EB1C MT plus end association as function of time in the top and bottom halves of the cell shown in **f**. Solid lines are exponential curve fits. Shaded areas indicate time periods without blue light exposure.

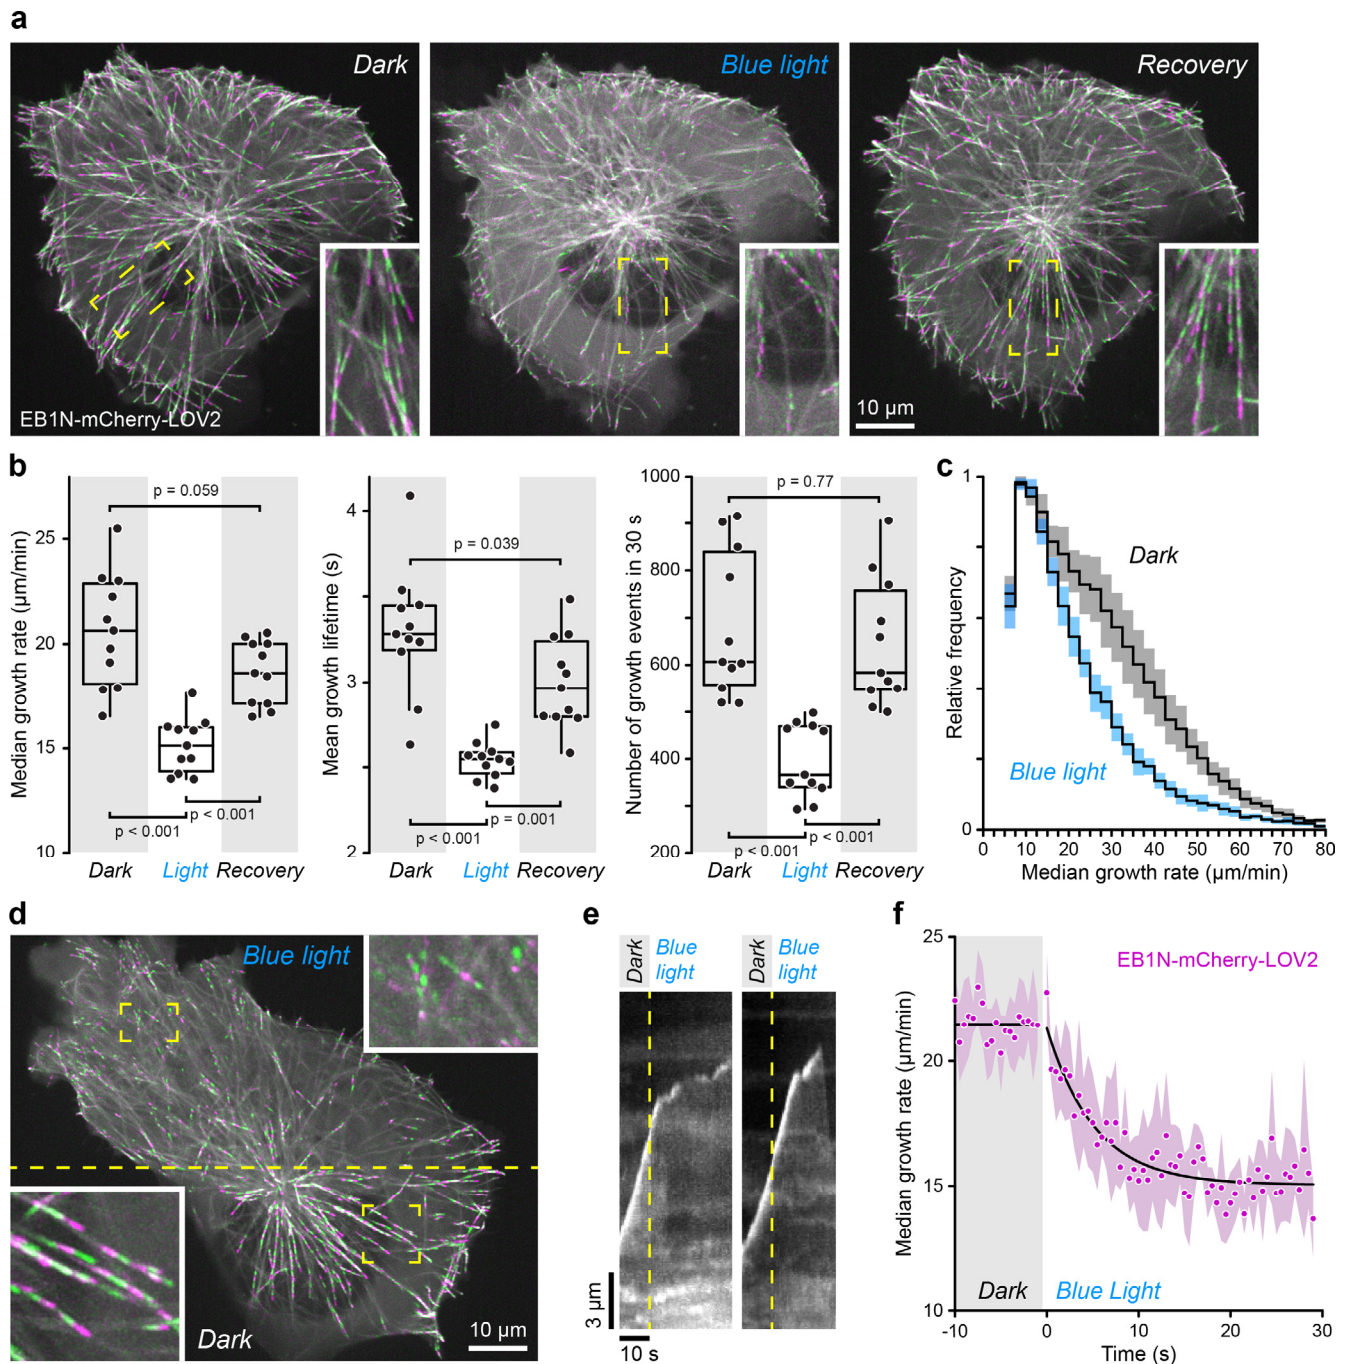

**Figure 3. Attenuation of MT growth by  $\pi$ -EB1 photo-dissociation.**

**(a)** Projections of EB1N-mCherry-LOV2 labelled MT plus ends in 20 s temporal windows before, after 30 s during blue light exposure, and after 3 min recovery in the dark. Insets show the indicated regions at higher magnification. MT growth tracks appear in alternating colours. **(b)** Quantification of MT polymerization dynamics by tracking EB1N-mCherry-LOV2 labelled MT ends. Growth rates are frame-to-frame measurements from images acquired at 0.5 s intervals. Each symbol represents one

cell. p-values were determined by Tukey-Kramer HSD test. **(c)** Comparison of the frame-to-frame MT growth rate distribution in the dark and during blue light exposure demonstrating a specific loss of fast growth events as a result of  $\pi$ -EB1 photo-dissociation. n = 11 cells. Shaded areas indicate 95% confidence intervals. **(d)** Local inhibition of MT growth by patterned blue light exposure. Only the top half of the cell shown was exposed to blue light pulses between image acquisitions. **(e)** Example kymographs illustrating the response of rapidly growing MT ends to  $\pi$ -EB1 photo-dissociation. **(f)** Quantitative analysis of the intracellular MT population growth rate response as a function of time after  $\pi$ -EB1 photo-dissociation. Solid lines are linear (before) and exponential fits (during blue light exposure). n = 5 cells. Shaded area indicates the 95% confidence interval.

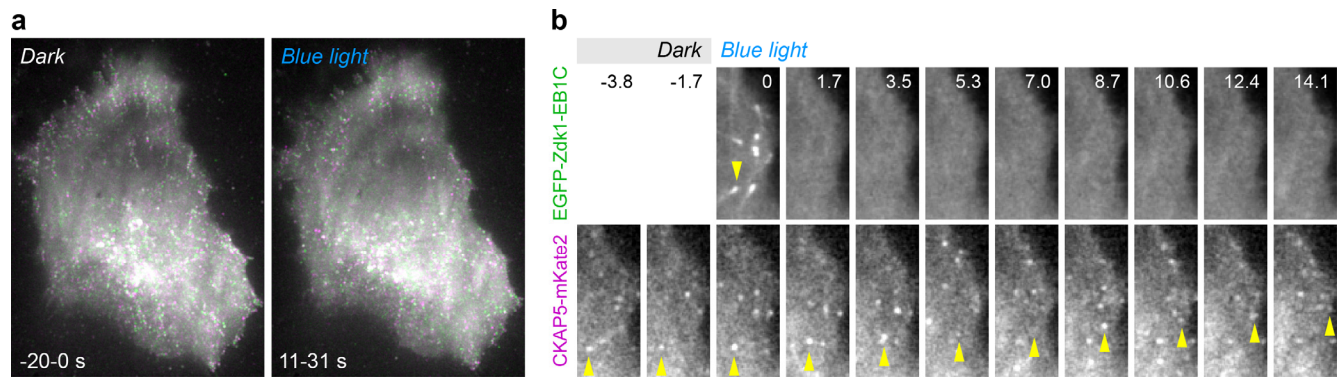

**Figure 4. The MT polymerase CKAP5 remains on MT ends upon  $\pi$ -EB1 photo-dissociation.**

**(a)** Projections of CKAP5-mKate2 TIRF microscopy time-lapse sequences over 20 s temporal windows just prior to and during blue light exposure. Although tracks of MT-end associated CKAP5 dots appear disorganized after  $\pi$ -EB1 photo-dissociation, likely because of attenuated MT growth, they are otherwise similar in appearance and intensity. **(b)** Examples of CKAP5 dot dynamics following  $\pi$ -EB1 photo-dissociation. Arrow highlights CKAP5 that appears to remain associated with a MT end during blue light exposure.

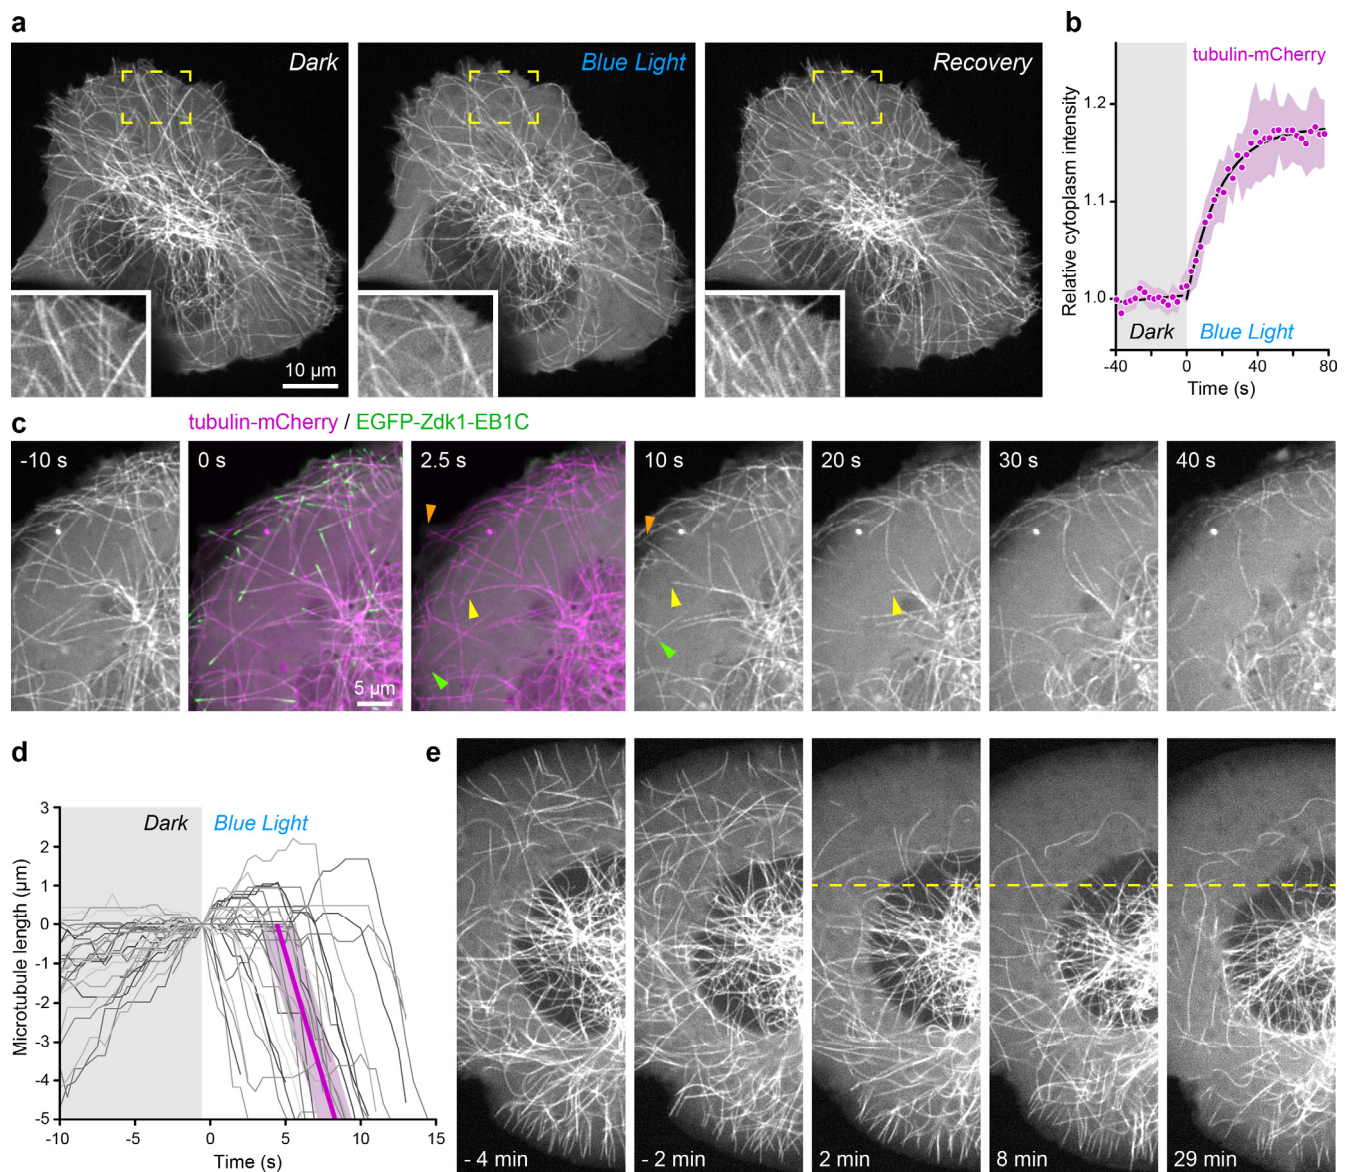

**Figure 5.  $\pi$ -EB1 photo-dissociation induced MT cytoskeleton reorganization.**

**(a)** Tubulin-mCherry expressing  $\pi$ -EB1 cell before, after 30 s during blue light exposure, and after 3 min recovery in the dark. Insets are indicated regions at higher magnification demonstrating reversible decrease of peripheral MT density. **(b)** Analysis of cytoplasmic tubulin-mCherry fluorescence intensity in response to  $\pi$ -EB1 photo-dissociation.  $n = 5$  cells. Shaded area indicates 95% confidence interval. **(c)** Rapid MT depolymerisation in response to  $\pi$ -EB1 photo-dissociation. Arrowheads highlight example MTs. **(d)** Life-history plots of MTs with ends near the cell edge aligned to the time of blue light exposure.  $n = 33$  MTs from 5 cells. The purple line is the average of linear fits of the depolymerizing phase of these MTs. Shaded area indicates 95% confidence interval. **(e)** Time-

lapse sequence of tubulin-mCherry in a Rac(Q61L)-expressing  $\pi$ -EB1 cell in response to local blue-light exposure (above the dashed line) illustrating sustained reorganization of the MT network.

## References

1. Kirschner, M. & Mitchison, T. Beyond self-assembly: from microtubules to morphogenesis. *Cell* **45**, 329-342 (1986).
2. Wang, H., *et al.* LOVTRAP: an optogenetic system for photoinduced protein dissociation. *Nat. Methods* **13**, 755-758 (2016).
3. Kumar, P. & Wittmann, T. +TIPs: SxIPping along microtubule ends. *Trends Cell Biol.* **22**, 418-428 (2012).
4. Akhmanova, A. & Steinmetz, M. O. Control of microtubule organization and dynamics: two ends in the limelight. *Nat. Rev. Mol. Cell Biol.* **16**, 711-726 (2015).
5. van der Vaart, B., *et al.* SLAIN2 links microtubule plus end-tracking proteins and controls microtubule growth in interphase. *J. Cell Biol.* **193**, 1083-1099 (2011).
6. Montenegro, G. S., *et al.* In vitro reconstitution of the functional interplay between MCAK and EB3 at microtubule plus ends. *Curr. Biol.* **20**, 1717-1722 (2010).
7. Cearns, M. D., *et al.* Microtubules, polarity and vertebrate neural tube morphogenesis. *J. Anat.* **229**, 63-74 (2016).
8. Maurer, S. P., *et al.* EBs Recognize a Nucleotide-Dependent Structural Cap at Growing Microtubule Ends. *Cell* **149**, 371-382 (2012).
9. Zhang, R., Alushin, G. M., Brown, A., & Nogales, E. Mechanistic Origin of Microtubule Dynamic Instability and Its Modulation by EB Proteins. *Cell* **162**, 849-859 (2015).
10. Honnappa, S., *et al.* An EB1-binding motif acts as a microtubule tip localization signal. *Cell* **138**, 366-376 (2009).
11. Zhang, K. & Cui, B. Optogenetic control of intracellular signaling pathways. *Trends Biotechnol.* **33**, 92-100 (2015).
12. Slep, K. C. & Vale, R. D. Structural basis of microtubule plus end tracking by XMAP215, CLIP-170, and EB1. *Mol. Cell* **27**, 976-991 (2007).
13. Komarova, Y., *et al.* Mammalian end binding proteins control persistent microtubule growth. *J. Cell Biol.* **184**, 691-706 (2009).
14. Skube, S. B., Chaverri, J. M., & Goodson, H. V. Effect of GFP tags on the localization of EB1 and EB1 fragments in vivo. *Cell Motil. Cytoskeleton* (2009).
15. Dragestein, K. A., *et al.* Dynamic behavior of GFP-CLIP-170 reveals fast protein turnover on microtubule plus ends. *J. Cell Biol.* **180**, 729-737 (2008).
16. Seetapun, D., *et al.* Estimating the microtubule GTP cap size in vivo. *Curr. Biol.* **22**, 1681-1687 (2012).
17. Yan, X., Habedanck, R., & Nigg, E. A. A complex of two centrosomal proteins, CAP350 and FOP, cooperates with EB1 in microtubule anchoring. *Mol. Biol. Cell* **17**, 634-644 (2006).

18. Wang, T., *et al.* Translating mRNAs strongly correlate to proteins in a multivariate manner and their translation ratios are phenotype specific. *Nucleic Acids Res.* **41**, 4743-4754 (2013).
19. De Groot, C. O., *et al.* Molecular insights into mammalian end-binding protein heterodimerization. *J. Biol. Chem.* **285**, 5802-5814 (2010).
20. Miller, P. M., *et al.* Golgi-derived CLASP-dependent microtubules control Golgi organization and polarized trafficking in motile cells. *Nat. Cell Biol.* **11**, 1069-1080 (2009).
21. Christie, J. M., *et al.* Steric interactions stabilize the signaling state of the LOV2 domain of phototropin 1. *Biochemistry* **46**, 9310-9319 (2007).
22. Shu, X., *et al.* A genetically encoded tag for correlated light and electron microscopy of intact cells, tissues, and organisms. *PLoS. Biol.* **9**, e1001041 (2011).
23. Ettinger, A. & Wittmann, T. Fluorescence live cell imaging. *Methods Cell Biol.* **123**, 77-94 (2014).
24. Gierke, S. & Wittmann, T. EB1-recruited microtubule +TIP complexes coordinate protrusion dynamics during 3D epithelial remodeling. *Curr. Biol.* **22**, 753-762 (2012).
25. Kumar, P., *et al.* GSK3beta phosphorylation modulates CLASP-microtubule association and lamella microtubule attachment. *J. Cell Biol.* **184**, 895-908 (2009).
26. Bieling, P., *et al.* CLIP-170 tracks growing microtubule ends by dynamically recognizing composite EB1/tubulin-binding sites. *J. Cell Biol.* **183**, 1223-1233 (2008).
27. Duellberg, C., Cade, N. I., Holmes, D., & Surrey, T. The size of the EB cap determines instantaneous microtubule stability. *Elife.* **5** (2016).
28. Nakamura, S., *et al.* Dissecting the nanoscale distributions and functions of microtubule-end-binding proteins EB1 and ch-TOG in interphase HeLa cells. *PLoS. One.* **7**, e51442 (2012).
29. Zanic, M., Widlund, P. O., Hyman, A. A., & Howard, J. Synergy between XMAP215 and EB1 increases microtubule growth rates to physiological levels. *Nat. Cell Biol.* **15**, 688-693 (2013).
30. Kaverina, I. & Straube, A. Regulation of cell migration by dynamic microtubules. *Semin. Cell Dev. Biol.* **22**, 968-974 (2011).
31. Wittmann, T., Bokoch, G. M., & Waterman-Storer, C. M. Regulation of leading edge microtubule and actin dynamics downstream of Rac1. *J. Cell Biol.* **161**, 845-851 (2003).
32. Braun, A., *et al.* Rac1 and Aurora A regulate MCAK to polarize microtubule growth in migrating endothelial cells. *J. Cell Biol.* **206**, 97-112 (2014).
33. Wittmann, T., Bokoch, G. M., & Waterman-Storer, C. M. Regulation of microtubule destabilizing activity of Op18/stathmin downstream of Rac1. *J. Biol. Chem.* **279**, 6196-6203 (2004).
34. Akhmanova, A., *et al.* Clasps are CLIP-115 and -170 associating proteins involved in the regional regulation of microtubule dynamics in motile fibroblasts. *Cell* **104**, 923-935 (2001).
35. Wu, Y. I., *et al.* A genetically encoded photoactivatable Rac controls the motility of living cells. *Nature* **461**, 104-108 (2009).



36. Strickland, D., *et al.* TULIPs: tunable, light-controlled interacting protein tags for cell biology. *Nat. Methods* **9**, 379-384 (2012).
37. Stehbens, S., Pemble, H., Murrow, L., & Wittmann, T. Imaging intracellular protein dynamics by spinning disk confocal microscopy. *Methods Enzymol.* **504**, 293-313 (2012).
38. Stehbens, S. J., *et al.* CLASPs link focal-adhesion-associated microtubule capture to localized exocytosis and adhesion site turnover. *Nat. Cell Biol.* **16**, 558-573 (2014).
39. Schindelin, J., *et al.* Fiji: an open-source platform for biological-image analysis. *Nat. Methods* **9**, 676-682 (2012).
40. Ettinger, A., van, H. J., Ribeiro, S. A., & Wittmann, T. Doublecortin Is Excluded from Growing Microtubule Ends and Recognizes the GDP-Microtubule Lattice. *Curr. Biol.* **26**, 1549-1555 (2016).
41. Matov, A., *et al.* Analysis of microtubule dynamic instability using a plus-end growth marker. *Nat. Methods* **7**, 761-768 (2010).
42. Jaqaman, K., *et al.* Robust single-particle tracking in live-cell time-lapse sequences. *Nat. Methods* **5**, 695-702 (2008).
43. Meijering, E., Dzyubachyk, O., & Smal, I. Methods for cell and particle tracking. *Methods Enzymol.* **504**, 183-200 (2012).
44. Stehbens, S. J. & Wittmann, T. Analysis of focal adhesion turnover: A quantitative live-cell imaging example. *Methods Cell Biol.* **123**, 335-346 (2014).

## SUPPLEMENTARY DATA

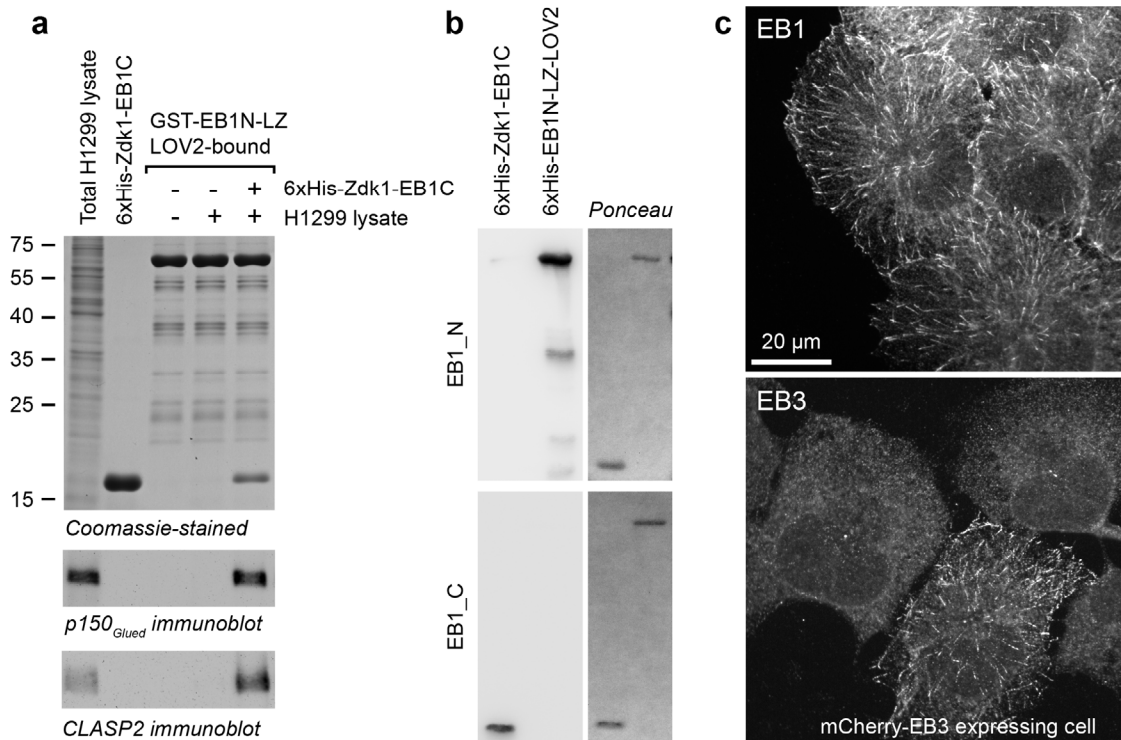

**Supplementary Figure 1.** (a) GST pull-down assay of +TIPs from H1299 cell lysate by bacterially produced purified  $\pi$ -EB1 (GST-EB1N-LZ-LOV2 and 6xHis-Zdk1-EB1C). CLASP2 and p150<sub>Glued</sub> were only isolated from cell lysate in the presence of Zdk1-EB1C indicating a functional interaction of  $\pi$ -EB1 with representative +TIPs. (b) Immunoblots of the indicated bacterially produced purified 6xHis-tagged proteins probed with commercially available anti-EB1 antibodies demonstrating the specificity for either the N- or C-terminal half of  $\pi$ -EB1. EB1\_N: Thermo Fisher Scientific Clone 1A11/4; EB1\_C: BD Biosciences Clone 5/EB1. Ponceau staining shows loading of the probed blots. (c) H1299 cells express high levels of EB1 but not EB3. Cells were stained as indicated for EB1 (BD Biosciences Clone 5/EB1) or EB3 (Absea Biotechnology KT36). While all cells express high levels of EB1, only cells transiently transfected with mCherry-EB3 were labelled by the EB3 antibody.

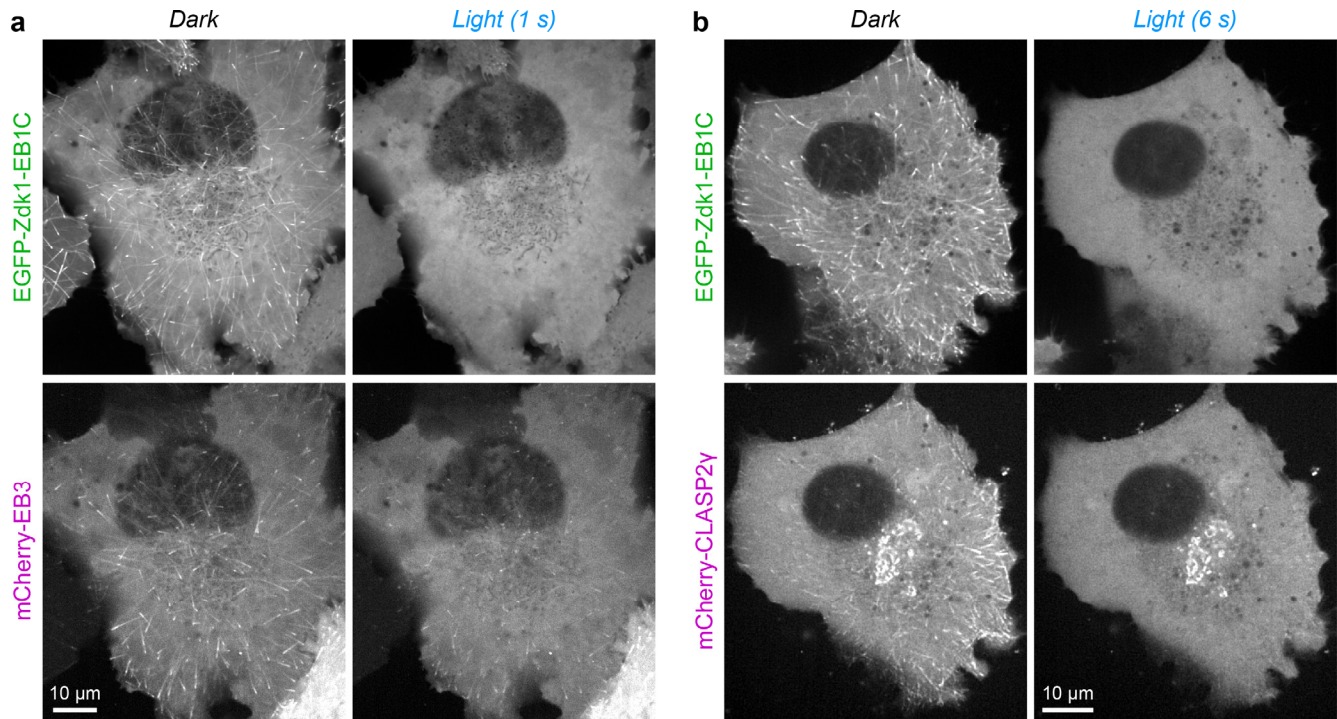

**Supplementary Figure 2.** (a)  $\pi$ -EB1 photo-dissociation partially dissociates transiently transfected mCherry-EB3 from growing MT ends. This is likely due to heterodimerization of different EBs and indicates that  $\pi$ -EB1 may act as a dominant negative even in the background of remaining endogenous EBs. (b)  $\pi$ -EB1 photo-dissociation results in dissociation of transiently transfected mCherry-CLASP2 $\gamma$  from growing MT ends. mCherry-CLASP2 $\gamma$  remains at the Golgi apparatus to which it binds independent of microtubules, indicating specific disruption of MT interactions only. In both (a) and (b) the dark panel is the first exposure at 488 nm.

|                                    |                                                       |
|------------------------------------|-------------------------------------------------------|
| <b>1. EB1N-LZ-LOV2</b>             |                                                       |
| EB1N-forward                       | GGTGCTAGCACCATGGCAGTGAACGTATACTCA                     |
| EB1N-reverse                       | TTTATCTTCCAGCTGTTTCATACCAGGGTTCTTTTCGCACCAC           |
| LZ-forward                         | GAACCCTGGTATGAAACAGCTGGAAGATAAA                       |
| LZ-reverse                         | GGTCTCGAGTTCGCCACCAGCTT                               |
| LOV2-forward                       | GGTCCGCGGGTCTGGAAGTGGATTGGCTGCT                       |
| LOV2-reverse                       | GGTGGATCCTTAAAGTTCTTTTGCCGCCTCATC                     |
| <b>2. EB1N-LZ-mCherry/GFP-LOV2</b> |                                                       |
| GFP/mCherry-forward                | GAACTCGAGATGGTGAGCAAGGGCGAGGAG                        |
| GFP/mCherry-reverse                | ACCCCGCGGCTTGTACAGCTCGTCCATGCC                        |
| <b>3. EB1N-GFP-LZ-LOV2</b>         |                                                       |
| GCN4-LZ-forward                    | ATGGACGAGCTGTACAAGCCGCGGATGAAACAGCTGGAAGATAAAGTGAAGA  |
| GCN4-LZ-reverse                    | CAGCAGCCAATCCACTTCCAGAACCCCGGGTACCGTCGACTGCAGAAATTCGA |
| <b>4. mCherry-ZDK1-EB1C</b>        |                                                       |
| mCherry-ZDK1-linker forward        | GGTGCTAGCACCATGGTGAGCAAGGGCGAG                        |
| mCherry-ZDK1-linker reverse        | CTCGTCTCTCCGTTGCCACGCTACCACCAGAACCACC                 |
| EB1C forward                       | GGTGGTTCTGGTGGTAGCGTGGGCAACGGAGACGACGAG               |
| EB1C reverse                       | GGTCTCGAGTTAATACTCTTCTTGCTCCTC                        |
| <b>5. GST-EB1N-LZ-LOV2</b>         |                                                       |
| forward                            | CGTGGATCCATGGCAGTGAACGTATACTCA                        |
| reverse                            | GGTCCCGGGTTAAAGTTCTTTTGCCGCCTC                        |
| <b>6. 6xHis-ZDK1-EB1C</b>          |                                                       |
| forward                            | TCCGCTAGCATGGTGGATAACAAATTC AATAAAG                   |
| reverse                            | GAGCTCGAGTTAATACTCTTCTTGCTCCTC                        |
| <b>7. GST-LOV2</b>                 |                                                       |
| forward                            | GCTGGATCCGGTTCTGGAAGTGGATTGGCTGCTGCACTTGAA            |
| reverse                            | CCGCTCGAGTTAAAGTTCTTTTGC                              |
| <b>8. mCherry-SLAIN2</b>           |                                                       |
| forward                            | GATCTCGAGCTATGGAGGACGTTAACTCCAACGTGAACG               |
| reverse                            | GCAGAATTCTCAGTAACAGCCATCTTTCCAAC                      |
| <b>9. CKAP5-mKate2</b>             |                                                       |
| mKate2 forward                     | AGCGGATCCAATGGTGAGCGAGCTGATTAAG                       |
| mKate2 reverse                     | AGTCGCGGCCGCTCATCTGTGCCCCAGTTTGCTAGGG                 |

**Supplementary Table 1:** PCR primer sequences used for cloning as described in the methods section.

## Supplementary Videos

**Video 1.** Time-lapse sequence of five consecutive cycles of  $\pi$ -EB1 photo-dissociation showing immediate and reversible release of both the EGFP-tagged  $\pi$ -EB1 C-terminal half and mCherry-SLAIN2 from growing MT ends when 488 nm blue light is turned on. Images were acquired every 2 seconds with a 3 min dark recovery phase between cycles.

**Video 2.** Time-lapse sequence of mCherry-Zdk1-EB1C showing local and reversible  $\pi$ -EB1 photo-dissociation by alternating patterns of blue light exposure. The boundary sharpness in this video illustrates the best we can currently achieve. Images were acquired at one frame per second, and playback is accelerated 15x.

**Video 3.** Time-lapse sequence of EB1N-mCherry-LOV2 before, during and after blue light exposure showing reversible inhibition of MT growth as a result of  $\pi$ -EB1 photo-dissociation. Images were acquired at two frames per second, and playback is accelerated 30x.

**Video 4.** Time-lapse sequence of EB1N-mCherry-LOV2 showing local inhibition of MT growth. Only the top half of the cell is exposed to 470 nm blue light during the 40-79 second time window. Images were acquired at one frame per second, and playback is accelerated 15x.

**Video 5.** Time-lapse sequence of CKAP5-mKate2 dynamics by TIRF microscopy before and during of  $\pi$ -EB1 photo-dissociation. Dynamic CKAP5-mKate2 dots remain during blue light exposure that indicating that CKAP5 association with the most distal tip of growing MTs does not depend on functional EB1. Top panel shows the EGFP-tagged C-terminal half of  $\pi$ -EB1 dissociating from MT ends when 488 nm exposure is turned on.

**Video 6.** Time-lapse sequence of tubulin-mCherry before and during blue light exposure illustrating rapid depolymerization of a population of microtubules in response to  $\pi$ -EB1 photo-dissociation. Left panel shows the EGFP-tagged C-terminal half of  $\pi$ -EB1 dissociating from MT ends when 488 nm exposure is turned on. Images were acquired every 2.5 seconds and playback is accelerated 6x.

**Video 7.** Time-lapse sequence of tubulin-mCherry in a Rac1(Q61L)-expressing  $\pi$ -EB1 cell. Only approximately the right third of the cell is exposed to blue light resulting in sustained retraction of the MT network from this part of the cell. Images were acquired every 30 seconds and playback is accelerated 450x.
